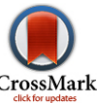

## Correction

# Correction: Characterization of *Glomerella* Strains Recovered from Anthracnose Lesions on Common Bean Plants in Brazil

The PLOS ONE Staff

The following information is missing from the Funding section: The information reported in this paper (No. 14-12-005) is part of a project of the Kentucky Agricultural Experiment Station and is published with the approval of the Director.

## Reference

1. Barcelos QL, Pinto JMA, Vaillancourt LJ, Souza EA (2014) Characterization of *Glomerella* Strains Recovered from Anthracnose Lesions on Common Bean Plants in Brazil. PLoS ONE 9(3): e90910. doi:10.1371/journal.pone.0090910

**Citation:** The PLOS ONE Staff (2014) Correction: Characterization of *Glomerella* Strains Recovered from Anthracnose Lesions on Common Bean Plants in Brazil. PLoS ONE 9(6): e100438. doi:10.1371/journal.pone.0100438

**Published:** June 13, 2014

**Copyright:** © 2014 The PLOS ONE Staff. This is an open-access article distributed under the terms of the Creative Commons Attribution License, which permits unrestricted use, distribution, and reproduction in any medium, provided the original author and source are credited.
